# Supplementary material for: TAp73 regulates mitochondrial dynamics and multiciliated cell homeostasis through an OPA1 axis
Source: PubMed Central journal article supplement (PMC11549358; doi:10.1038/s41419-024-07130-6), 2024-11-08

FIG 1D

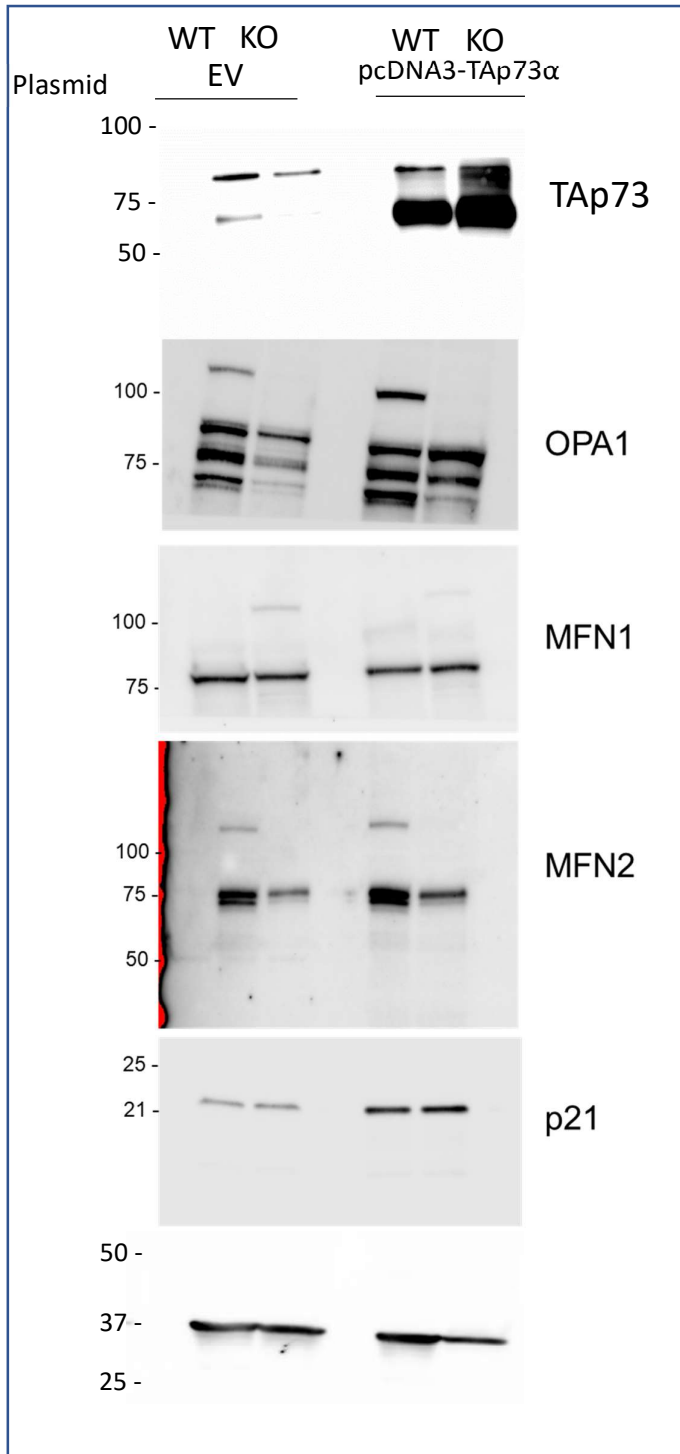

FIG 2B

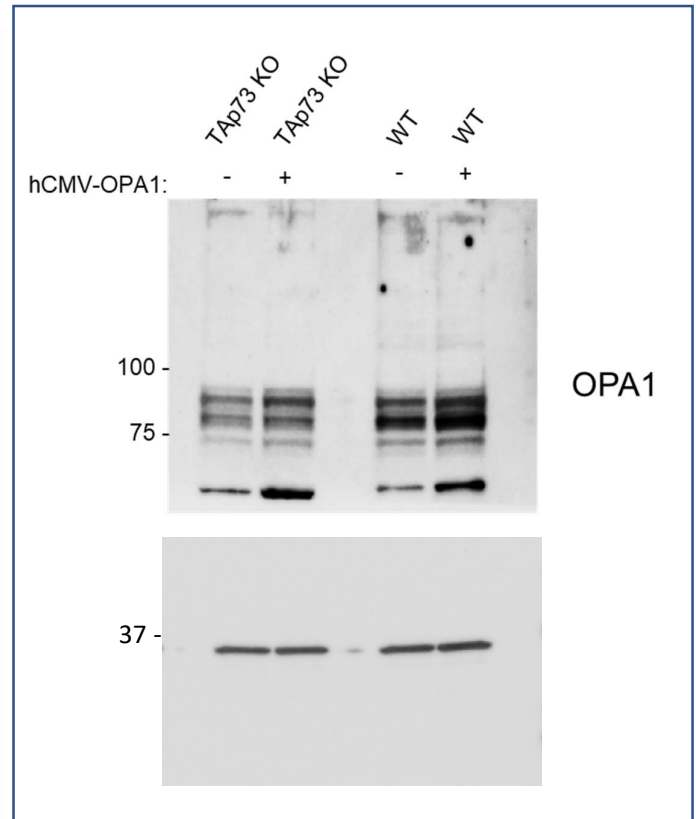

FIG 2H

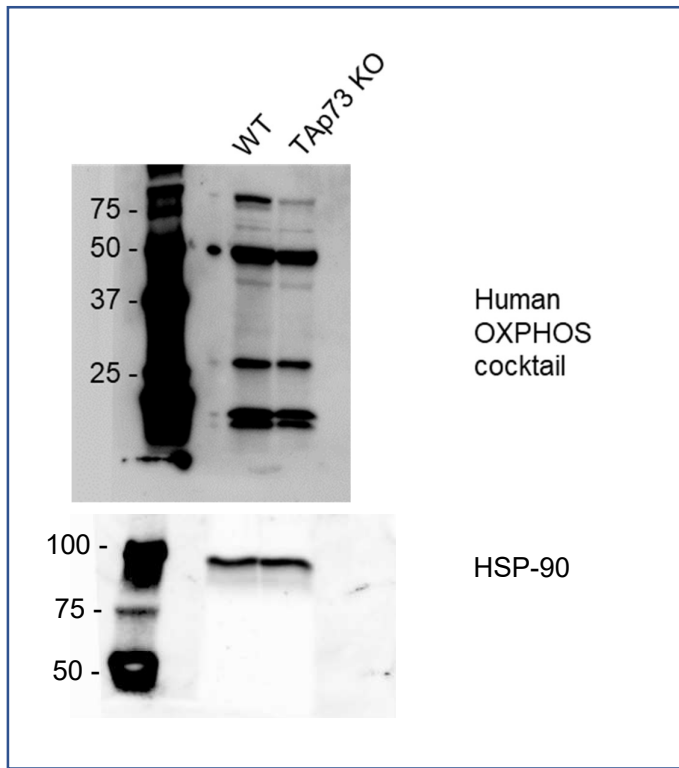

FIG 3B

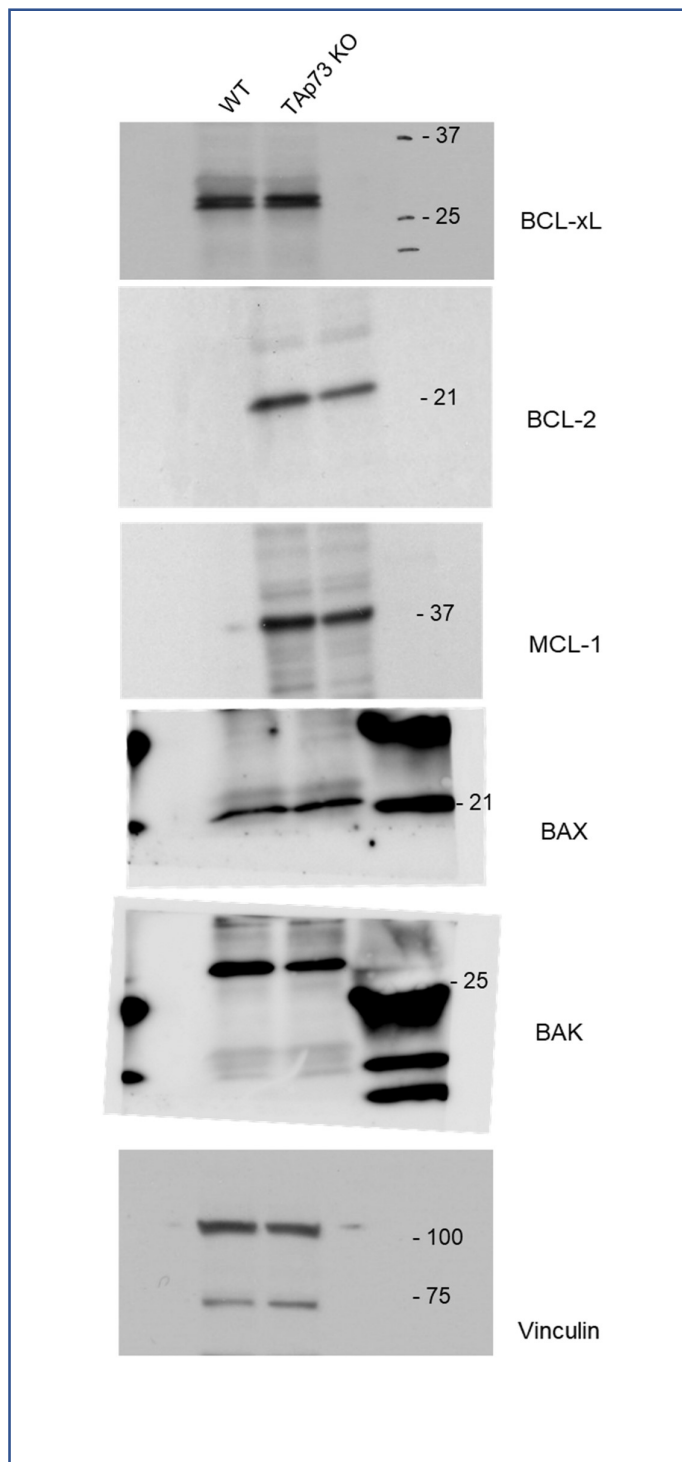

FIG S1A

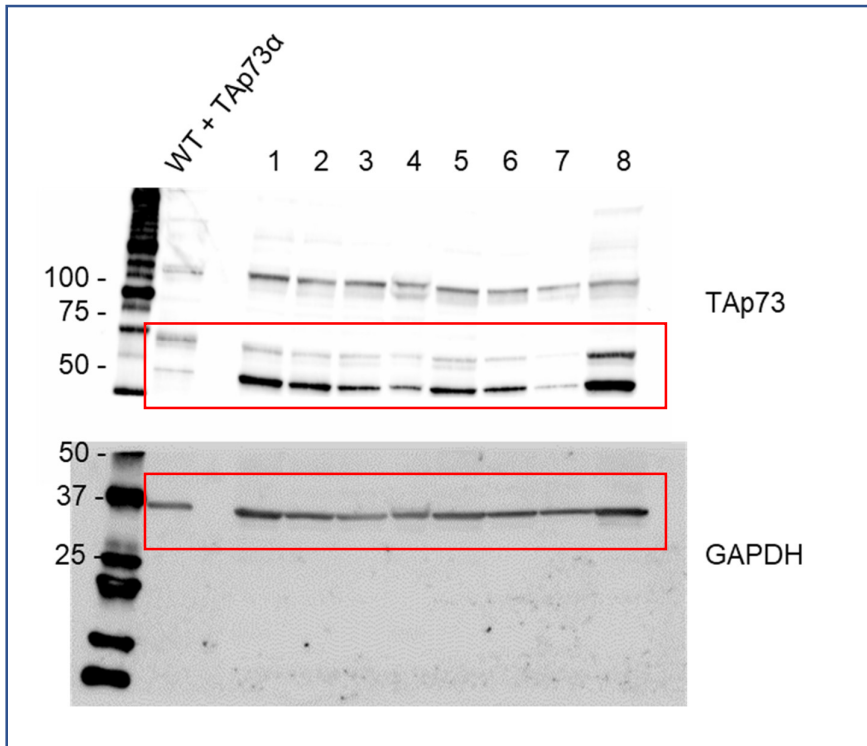

FIG S3B

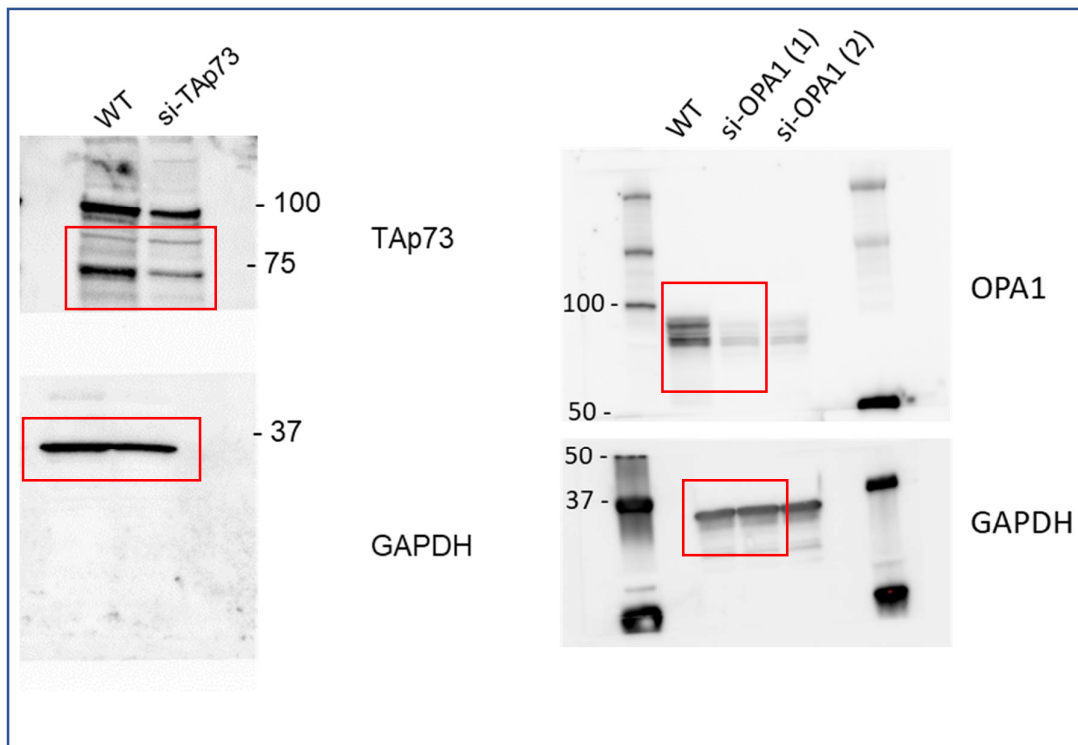

Supplement: 41419_2024_7130_MOESM4_ESM.pdf [file 41419_2024_7130_MOESM4_ESM.pdf]
